# Supplementary material for: A salt-bridge structure in solution revealed by 2D-IR spectroscopy
Source: Royal Society of Chemistry journal article supplement (doi:10.1039/c4cp00233d), 2014-01-01
Supplement: c4cp00233d1.pdf [file c4cp00233d1.pdf]

# Supplementary information

## Salt-Bridge Structure in Solution Revealed by 2D-IR Spectroscopy

Adriana Huerta-Viga, Sérgio R. Domingos, Saeed Amirjalayer and Sander Woutersen\*

Van 't Hoff Institute for Molecular Sciences (HIMS), University of Amsterdam  
Science Park 904, Amsterdam, The Netherlands

### Contents

|          |                                                                           |          |
|----------|---------------------------------------------------------------------------|----------|
| <b>1</b> | <b>Vibrational-exciton model for three coupled anharmonic oscillators</b> | <b>1</b> |
| <b>2</b> | <b>Fit parameters</b>                                                     | <b>3</b> |
| <b>3</b> | <i>Ab-initio</i> calculations                                             | <b>4</b> |
| <b>4</b> | Sample Preparation                                                        | <b>5</b> |
| <b>5</b> | Additional Data                                                           | <b>5</b> |

### 1 Vibrational-exciton model for three coupled anharmonic oscillators

Here we describe the formalism to calculate the eigenstates of three coupled anharmonic oscillators, and the elements of the transition-dipole moment matrix. The basis set chosen to describe the system is that formed by the eigenstates of non-interacting harmonic oscillators  $|l, m, n\rangle$ , where the oscillators have  $l$ ,  $m$  and  $n$  vibrational quanta, respectively. These uncoupled oscillators are used as local modes of a system of coupled oscillators. Taking the weak pump approximation implies that a maximum of two vibrational quanta are available, and the basis set is

$$\{|000\rangle, |100\rangle, |010\rangle, |001\rangle, |200\rangle, |020\rangle, |002\rangle, |110\rangle, |101\rangle, |011\rangle\}. \quad (1)$$

Taking a dipole approximation for the potential, the hamiltonian for the zero-, one- and two-exciton manifold can be calculated.<sup>1</sup> The zero-exciton manifold is  $H^{(0)} = (0)$ . The one-exciton manifold in the local basis set is given by

$$H^{(1)} = \begin{pmatrix} \epsilon_1 & \beta_{12} & \beta_{13} \\ \beta_{12} & \epsilon_2 & \beta_{23} \\ \beta_{13} & \beta_{23} & \epsilon_3 \end{pmatrix}, \quad (2)$$

where  $\epsilon_i$  are the local-mode energies, and  $\beta_{ij}$  are the couplings between them. The two-exciton manifold is given by

$$H^{(2)} = \begin{pmatrix} 2\epsilon_1 - \Delta_1 & 0 & 0 & \sqrt{2}\beta_{12} & \sqrt{2}\beta_{13} & 0 \\ 0 & 2\epsilon_2 - \Delta_2 & 0 & \sqrt{2}\beta_{12} & 0 & \sqrt{2}\beta_{23} \\ 0 & 0 & 2\epsilon_3 - \Delta_3 & 0 & \sqrt{2}\beta_{13} & \sqrt{2}\beta_{23} \\ \sqrt{2}\beta_{12} & \sqrt{2}\beta_{12} & 0 & \epsilon_1 + \epsilon_2 & \beta_{23} & \beta_{13} \\ \sqrt{2}\beta_{13} & 0 & \sqrt{2}\beta_{13} & \beta_{23} & \epsilon_1 + \epsilon_3 & \beta_{12} \\ 0 & \sqrt{2}\beta_{23} & \sqrt{2}\beta_{23} & \beta_{13} & \beta_{12} & \epsilon_2 + \epsilon_3 \end{pmatrix}. \quad (3)$$

Note that the anharmonicities  $\Delta_i$  were introduced phenomenologically. Also note that the matrix elements of the Hamiltonian in which two excitons are changed are zero, e.g.  $\langle 200|H|011\rangle = 0$ , and that  $\beta_{23} = \langle 101|H|110\rangle = \langle 001|H|010\rangle$ . After diagonalizing this Hamiltonian, states  $\{|\Omega_0^{(0)}\rangle, |\Omega_j^{(1)}\rangle, |\Omega_k^{(2)}\rangle\}$  will be obtained, with  $1 \leq j \leq 3$  and  $4 \leq k \leq 9$ . The transition-dipole moment matrix, written in the local-mode basis set is,

$$\hat{\mu} = \begin{pmatrix} & \mu_1 & \mu_2 & \mu_3 & & & & & \\ \mu_1 & & & & \sqrt{2}\mu_1 & 0 & 0 & \mu_2 & \mu_3 & 0 \\ \mu_2 & & & & 0 & \sqrt{2}\mu_2 & 0 & \mu_1 & 0 & \mu_3 \\ \mu_3 & & & & 0 & 0 & \sqrt{2}\mu_3 & 0 & \mu_1 & \mu_2 \\ & \sqrt{2}\mu_1 & 0 & 0 & & & & & & \\ & 0 & \sqrt{2}\mu_2 & 0 & & & & & & \\ & 0 & 0 & \sqrt{2}\mu_3 & & & & & & \\ & \mu_2 & \mu_1 & 0 & & & & & & \\ & \mu_3 & 0 & \mu_1 & & & & & & \\ & 0 & \mu_3 & \mu_2 & & & & & & \end{pmatrix}. \quad (4)$$

This operator needs to be written in the exciton basis set formed by the  $\{|\Omega_i^{(n)}\rangle\}$  states, which is done via a similarity transformation. The elements  $\mu_{nm}$  and the  $\Omega_i^{(n)}$  energies are used to calculate the linear response, which is given by

$$\alpha_{\epsilon_1, \epsilon_2}(\omega) = \sum_j \frac{|\mu_{0j}|^2 \gamma_j}{(\omega - \Omega_j^{(1)})^2 + \gamma_j^2}, \quad (5)$$

with  $1 \leq j \leq 3$  and where the  $\Omega_j^{(1)}$  depend parametrically on  $\epsilon_1$  and  $\epsilon_2$ , and  $\gamma_j$  are the homogeneous linewidths of the transitions. The 2D-IR response is given by

$$\begin{aligned} \Delta\alpha_{\epsilon_1, \epsilon_2}(\omega_{\text{pump}}, \omega_{\text{probe}}) = & \\ - \sum_i & \frac{\gamma_i^2(1 + \gamma_i/\Gamma) [p_2|\mu_{0i}|^2|\mu_{0i}|^2 + p_1|\mu_{0i}|^2|\mu_{0i}|^2]}{[(\omega_{\text{pump}} - \Omega_i^{(1)})^2 + (\gamma_i + \Gamma)^2] [(\omega_{\text{probe}} - \Omega_i^{(1)})^2 + \gamma_i^2]} \\ - \sum_{i,j} & \frac{\gamma_i\gamma_j(1 + \gamma_j/\Gamma) [p_2|\mu_{0i}|^2|\mu_{0j}|^2 + p_1(\mu_{0i} \cdot \mu_{0j})^2]}{[(\omega_{\text{pump}} - \Omega_i^{(1)})^2 + (\gamma_j + \Gamma)^2] [(\omega_{\text{probe}} - \Omega_j^{(1)})^2 + \gamma_i^2]} \\ + \sum_{i,k} & \frac{\gamma_i\gamma_k(1 + \gamma_i/\Gamma) [p_2|\mu_{ik}|^2|\mu_{0i}|^2 + p_1(\mu_{ik} \cdot \mu_{0i})^2]}{[(\omega_{\text{pump}} - \Omega_i^{(1)})^2 + (\gamma_i + \Gamma)^2] [(\omega_{\text{probe}} - (\Omega_k^{(2)} - \Omega_i^{(1)}))^2 + \gamma_k^{*2}]}, \end{aligned} \quad (6)$$

with  $1 \leq i, j \leq 3$  and  $4 \leq k \leq 9$ . The first term in this equation is the contribution to the pump-probe signal due to ground-state bleaching, the second term is the stimulated emission and the third term is the excited-state absorption.  $\gamma_i^*$  are the homogeneous linewidth of the  $|\Omega_j^{(1)}\rangle \rightarrow |\Omega_k^{(2)}\rangle$  transitions.  $\Gamma$  is the half-width at half-maximum of the pump spectrum. The values for  $p_1$  and  $p_2$  determine the polarization between pump and probe pulses of the 2D-IR signal, and they arise from the two possible polarizations between the pump and probe fields.<sup>2</sup> To calculate  $\Delta\alpha_{\parallel}$ , the parallel-polarization signal,  $p_1 = 2$ ,  $p_2 = -1$ , and  $\Delta\alpha_{\perp}$ , the perpendicular-polarization signal,  $p_1 = 1$ ,  $p_2 = 2$ . The fact that we measure on an ensemble of molecules in different solvent surroundings is taken into account in the model. Following the central limit theorem<sup>3</sup>, the local-state frequencies  $\epsilon_1$  and  $\epsilon_2$  are considered to have Gaussian probability distributions around central values  $\bar{\epsilon}_i$ , such that the linear absorption becomes

$$\alpha_{\bar{\epsilon}_1, \bar{\epsilon}_2, \bar{\epsilon}_3}(\omega) = \iiint d\epsilon_1 d\epsilon_2 d\epsilon_3 e^{(\epsilon_1 - \bar{\epsilon}_1)^2/\sigma_1^2} e^{(\epsilon_2 - \bar{\epsilon}_2)^2/\sigma_2^2} e^{(\epsilon_3 - \bar{\epsilon}_3)^2/\sigma_3^2} \alpha_{\epsilon_1, \epsilon_2, \epsilon_3}(\omega), \quad (7)$$

where  $\sigma_i$  are the inhomogeneous line widths of the transitions, and the integrals are performed over the range  $(\epsilon_i - \frac{3}{2}\sigma_i, \epsilon_i + \frac{3}{2}\sigma_i)$ . The expression to obtain the 2D-IR response is analogous to that in equation 7.

We use the vibrational-exciton model to calculate the 2D-IR response of three oscillators that are involved in a salt bridge between  $\text{Gdm}^+$  and  $\text{Ac}^-$ . The  $\text{Gdm}^+$  modes arise from  $\text{CN}_3\text{D}_6^+$  vibrations, and the  $\text{Ac}^-$  mode from a  $\text{COO}^-$  antisymmetric stretch vibration. These modes are essentially different and thus we use different values for the intensity of their transition dipole moments  $|\mu_i|$ , their anharmonicities  $\Delta_i$ , and homogeneous linewidths  $\gamma_i$  and  $\gamma_i^*$ . We also take different values for their inhomogeneous linewidths  $\sigma_i$ . The two  $\text{CN}_3\text{D}_6^+$  modes show an anticorrelation behaviour, which can be detected through the elongation of the cross peaks that occurs along the antidiagonal line of the 2D plot.<sup>4,5</sup> To account for this anticorrelation we include in the model a Gaussian distribution for the value of the coupling  $\beta_{ij}$  between the two  $\text{CN}_3\text{D}_6^+$  modes, which has a width  $\sigma_\beta$  that is a parameter of the fit.

## 2 Fit parameters

The fitting routine uses the Levenberg-Marquardt Method to minimize  $\chi^2 = \sum_{i=1}^N \left[ \frac{y_i^{\text{exp}} - y_i^{\text{calc}}}{\sigma_i} \right]^2$ , where  $y_i^{\text{exp}}$  are the measured points that have standard deviations  $\sigma_i$ , and  $y_i^{\text{calc}}$  are the calculated values (which depend on the fitting parameters). The fits are performed simultaneously on the parallel and perpendicular 2D-IR measurements, using an independent overall scaling factor for each. The width of the pump spectrum is  $\Gamma = 3.3 \text{ cm}^{-1}$ , which was determined experimentally and was a fixed parameter of the fits. The 2D-IR signal is a function of the angles  $\theta_{ij}$  between the transition dipole moments through the dot products of equation 7. The definition of these angles is shown in Figure S1. Note that, using these definitions,  $\{\theta_{12}, \theta_{13}, \theta_{23}\}$  are not orthogonal coordinates for the orientation of the  $\mu_i$ , i.e.  $\theta_{23}$  cannot be changed without changing  $\theta_{12}$  and  $\theta_{13}$ . The angle  $\eta_3$  (see Figure S1) is an independent coordinate, and  $\{\theta_{12}, \theta_{13}, \eta_3\}$  were free parameters of the fit.  $\theta_{23}$  was calculated afterwards via

$$\theta_{23} = \cos^{-1} [\sin \theta_{12} \sin \theta_{13} \cos \eta_3 + \cos \theta_{12} \cos \theta_{13}]. \quad (8)$$

The parameters obtained from the fit are shown in Table S1. A rule of thumb for a good fit is that the reduced chi

Table S1: Fit parameters for the  $\text{Gdm}^+ \cdots \text{Ac}^-$  dimer. For each oscillator the parameters are: local-mode absorption frequency  $\epsilon$ ; anharmonicity  $\Delta$ ; homogeneous dephasing for the  $|0\rangle \rightarrow |1\rangle$  transition  $\gamma_{01}$ , and for the  $|1\rangle \rightarrow |2\rangle$  transition  $\gamma_{12}$ ; inhomogeneous width  $\sigma$ ; coupling between transition dipole moments  $\beta$ ; width of the distribution of couplings  $\sigma_\beta$ ; angle between transition dipole moments  $\theta$ . All parameters are given in  $\text{cm}^{-1}$  and the angle in degrees.  $\chi_r^2$  is 41.

| $\text{Gdm}_{\text{HF}}^+$                            |                |                    | $\text{Gdm}_{\text{LF}}^+$               |               |                    | $\text{Ac}^-$                            |               |                   |
|-------------------------------------------------------|----------------|--------------------|------------------------------------------|---------------|--------------------|------------------------------------------|---------------|-------------------|
|                                                       | $\epsilon$     | 1602               |                                          | $\epsilon$    | 1586               |                                          | $\epsilon$    | 1560              |
|                                                       | $\Delta$       | 4                  |                                          | $\Delta$      | 8                  |                                          | $\Delta$      | 14                |
|                                                       | $\gamma_{01}$  | 6                  |                                          | $\gamma_{01}$ | 5                  |                                          | $\gamma_{01}$ | 7                 |
|                                                       | $\gamma_{12}$  | 7                  |                                          | $\gamma_{12}$ | 6                  |                                          | $\gamma_{12}$ | 5                 |
|                                                       | $\sigma$       | 13                 |                                          | $\sigma$      | 22                 |                                          | $\sigma$      | 15                |
|                                                       | $\eta_3$       | 55                 |                                          |               |                    |                                          |               |                   |
| $\text{Gdm}_{\text{HF}}^+ - \text{Gdm}_{\text{LF}}^+$ |                |                    | $\text{Gdm}_{\text{HF}}^+ - \text{Ac}^-$ |               |                    | $\text{Gdm}_{\text{LF}}^+ - \text{Ac}^-$ |               |                   |
|                                                       | $\theta_{23}$  | $105 \pm 25^\circ$ |                                          | $\theta_{13}$ | $180^\circ \pm 15$ |                                          | $\theta_{12}$ | $75^\circ \pm 10$ |
|                                                       | $\beta_{23}$   | $-8 \pm 2$         |                                          | $\beta_{13}$  | $-11 \pm 3$        |                                          | $\beta_{12}$  | $8 \pm 3$         |
|                                                       | $\sigma_\beta$ | 12                 |                                          |               |                    |                                          |               |                   |

square  $\chi_r^2 = \frac{\chi^2}{N-M}$  should have a value  $\sim 1$  ( $N$  is the number of observation points and  $M$  the number of parameters).<sup>6</sup> However, the model we use is not linear in the parameters and we make several simplifications, so it is to be expected that  $\chi_r^2 > 1$ . Nonetheless, we find that the fits reproduce the measurements very well, despite the  $\chi_r^2$  being significantly

larger than 1. The outcome of a  $\chi^2$ -minimization routine is the covariance matrix, which is related to the confidence limits of the fitted parameters, but the values of  $\chi_r^2$  that we obtained are too large to follow this procedure (the resulting uncertainties are unrealistically small). Therefore, to obtain an estimate for the confidence limits in the values of  $\beta_{ij}$  and  $\theta_{ij}$  we changed the parameter until the value for  $\chi_r^2$  was at least 50% larger. These confidence limits are listed in Table S1. The result of our fit shows that  $\mu_1$  and  $\mu_3$  are approximately antiparallel, and from equation 8,  $\theta_{23} \approx 180 - \theta_{12}$ , which is valid for all values of  $\eta_3$ . Therefore, for this geometry of transition dipole moments changing  $\eta_3$  does not result in a significant increase of  $\chi_r^2$ . We estimated confidence limits for  $\theta_{23}$  using equation 8 with the confidence limits of  $\theta_{12}$  and  $\theta_{13}$ , and the full range of possible values of  $\eta_3$ .

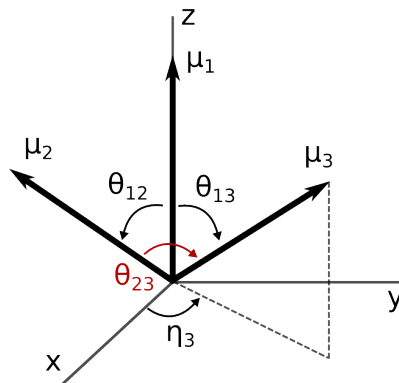

Figure S1: Definition of the angles between the transition-dipole moments  $\theta_{ij}$  in the reference frame used for the fit.

### 3 *Ab-initio* calculations

It has been shown before that  $\text{Gdm}^+$  has a degenerate mode at  $\sim 1600 \text{ cm}^{-1}$  due to the  $\text{CN}_3$  and  $\text{NH}_2$  scissors motion.<sup>7</sup> In Figure S2 we show the frequencies and intensities for the vibrational modes involved in the  $\text{Gdm}^+ \cdots \text{Ac}^-$  salt bridge, obtained from a calculation using Gaussian03<sup>8</sup> at the MP2/6-311+G(d) level of theory (the optimized geometry is shown in Figure 1A of the manuscript). The lowest frequency mode in the spectrum of Figure S2 corresponds mainly to the  $\text{COO}^-$  antisymmetric stretch vibration of  $\text{Ac}^-$ , and the other two modes arise mainly from  $\text{CN}_3\text{D}_6$  vibrations of  $\text{Gdm}^+$ . There is a high degree of mixing between the  $\text{COO}^-$  mode and both of the  $\text{CN}_3\text{D}_6$  modes. The observed frequency splitting between these two modes upon salt bridge formation is in agreement with our measurements in DMSO, shown in Figure 1B of the manuscript.

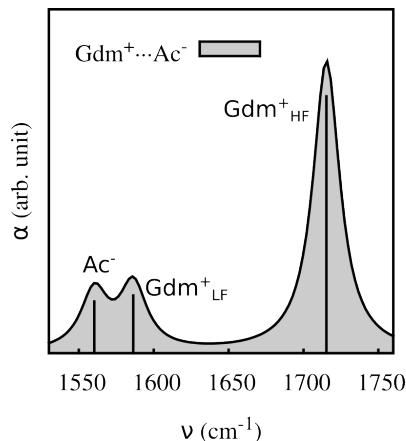

Figure S2: Frequencies and relative intensities of the vibrational modes of  $\text{Gdm}^+$  and  $\text{Ac}^-$  obtained from the MP2 calculation of the structure shown in Figure 1 in the manuscript.

## 4 Sample Preparation

Guanidine·Ac (>98% purity), guanidine·HCl (>98% purity), methylguanidine·HCl (>98% purity), and tetrabutylammonium acetate (>97% purity) were purchased from Sigma-Aldrich and used without further purification. Hydrogen-deuterium exchange of the carboxyl and guanidinium groups of these molecules was achieved by evaporating the compounds from excess D<sub>2</sub>O. Measurements were performed using a 400 mM concentration solution in dimethylsulfoxide (DMSO) of all compounds, at room temperature (23°C). These conditions allow more than 90% dimer formation.<sup>9</sup> Droplets of the solutions are placed between CaF<sub>2</sub> windows (2 mm thick), separated by a Teflon spacer of 10  $\mu$ m for the 2D-IR measurements and 25  $\mu$ m for the FTIR measurements.

## 5 Additional Data

We use a thin piece of InAs to measure a pump-probe cross-correlation to determine the intensity envelope of the pump pulses, which is approximately a single-sided exponential with a FWHM of 800 fs. In Figure S3 we show the pump-probe cross-correlation and the resulting dynamics of a representative diagonal and cross peak. Our measurements are done at 1.5 ps delay, at which the pump pulse intensity has almost vanished.

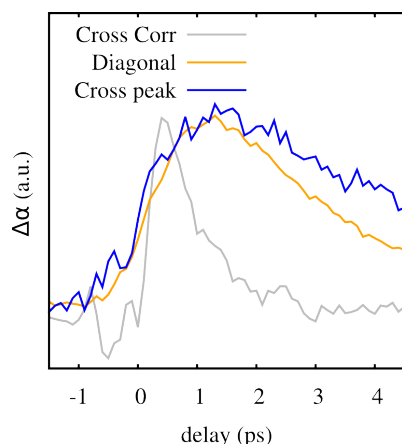

Figure S3: Cross correlation of the pump and probe pulses (gray), determined by 2-photon absorption in InAs; intensity of the induced absorption-diagonal band for when  $\nu_{\text{pump}} = \nu_{\text{ArgHF}}$  (yellow); Intensity of the induced absorption of the Arg<sub>LF</sub> cross peak (blue).

The frequency splitting between the two CN<sub>3</sub>H<sub>6</sub> modes of Gdm<sup>+</sup>, which are centered at  $\sim 1660$  cm<sup>-1</sup> in DMSO, is not detectable in the linear spectrum. However, a significant frequency splitting between the Gdm<sup>+</sup> modes is detected upon salt bridge formation with Ac<sup>-</sup>, as seen in Figure S4.

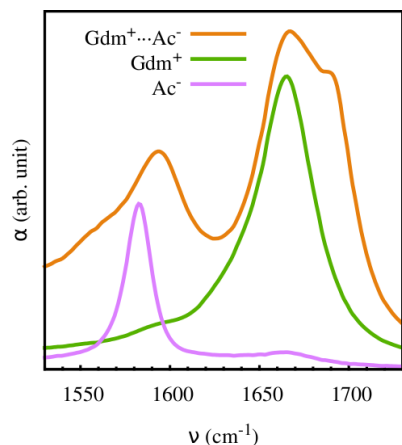

Figure S4: FTIR spectra of the non-deuterated Gdm<sup>+</sup>...Ac<sup>-</sup> dimer, Gdm<sup>+</sup> and Ac<sup>-</sup> in DMSO (solvent subtracted).

## References

- [1] P. Hamm and M. Zanni, *Concepts and Methods of 2D Infrared Spectroscopy*, Cambridge University Press, 1st edn, 2011.
- [2] S. Mukamel, *Principles of Nonlinear Optical Spectroscopy*, Oxford University Press, 1995.
- [3] R. Kubo and N. Hashitsume, *Statistical Physics II: Nonequilibrium Statistical Mechanics*, Springer, Berlin, 1985.
- [4] N. Demirdöven, M. Khalil, O. Golonzka and A. Tokmakoff, *J. Phys. Chem. A*, 2001, **105**, 8025–8030.
- [5] A. Ishizaki and Y. Tanimura, *J. Phys. Chem. A*, 2007, **111**, 9269–76.
- [6] W. H. Press, S. A. Teukolsky, W. T. Vetterling and B. P. Flannery, *Numerical Recipes in C: The art of Scientific Computing*, Chapter 15, Cambridge University Press, 2nd edn.
- [7] A. L. Magalhaes and J. A. N. F. Gomes, *Int. J. Quantum Chem.*, 1997, **61**, 725–739.
- [8] M. J. Frisch and et al, *Gaussian 03, Revision C.02*, Gaussian, Inc., Wallingford, CT, 2004.
- [9] B. Linton and A. D. Hamilton, *Tetrahedron*, 1999, **55**, 6027–6038.
